# Supplementary material for: Generation of novel oncolytic vaccinia virus with improved intravenous efficacy through protection against complement-mediated lysis and evasion of neutralization by vaccinia virus-specific antibodies
Source: HighWire-hosted journal article supplement (doi:10.1136/jitc-2022-006024), 2023-01-01
Supplement: jitc-2022-006024supp001_data_supplement.pdf [file jitc-2022-006024supp001_data_supplement.pdf]

## Generation of Novel Oncolytic Vaccinia Virus with Improved Intravenous Efficacy Through Protection Against Complement-Mediated Lysis and Evasion of Neutralization by Vaccinia Virus-Specific Antibodies

### Conventional Oncolytic Virus

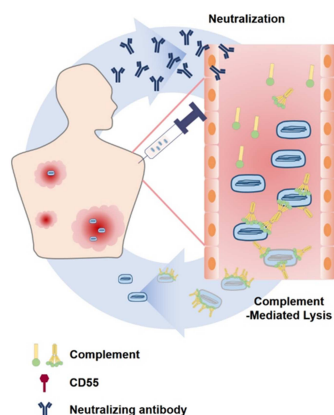

### Genetically Engineered Enveloped Virus

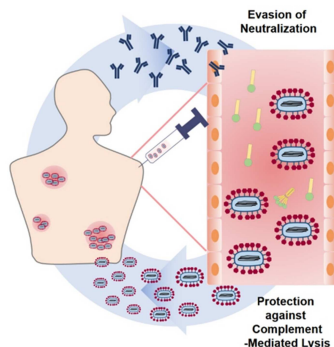

### Authors

Namhee Lee, Yun-Hui Jeon, Jiyeon Yoo, Suk-kyung Shin, Songyi Lee, Mi-Ju Park, Byung-Jin Jung, Yun-Kyoung Hong, Dong-Sup Lee, Keunhee Oh

### Correspondence Authors

[dlee5522@snu.ac.kr](mailto:dlee5522@snu.ac.kr) and [keunheeoh@gmail.com](mailto:keunheeoh@gmail.com)

### In Brief

SJ-600 series viruses, a novel oncolytic vaccinia virus platform expressing the human complement regulatory protein CD55 on the intracellular mature virion (IMV) membrane, improved intravenous efficacy through protection against complement-mediated lysis and evasion of neutralization by vaccinia virus-specific antibodies.
